# Supplementary material for: Receipt of infant HIV DNA PCR test results is associated with a reduction in retention of HIV-exposed infants in integrated HIV care and healthcare services: a quantitative sub-study nested within a cluster randomised trial in rural Malawi
Source: Springer Nature journal article supplement (doi:10.1186/s12889-020-09973-y), 2020-12-01
Supplement: MOESM1 [file 18663664]

**Supplementary Table 1:** Outline of PRIME study arms

| Study arm       | Services provided at one time and access point | Follow-up attempts of participants with missed visits by community health personnel | SMS reminder to community-based volunteers to follow-up participants with missed visits. |
|-----------------|------------------------------------------------|-------------------------------------------------------------------------------------|------------------------------------------------------------------------------------------|
| Arm 1 (MIP)     | ✓                                              | ✓                                                                                   | ✗                                                                                        |
| Arm 2 (MIP+SMS) | ✓                                              | ✓                                                                                   | ✓                                                                                        |
| Arm 3 (SOC)     | ✗                                              | ✓                                                                                   | ✗                                                                                        |
