# Supplementary material for: Receipt of infant HIV DNA PCR test results is associated with a reduction in retention of HIV-exposed infants in integrated HIV care and healthcare services: a quantitative sub-study nested within a cluster randomised trial in rural Malawi
Source: Springer Nature journal article supplement (doi:10.1186/s12889-020-09973-y), 2020-12-01
Supplement: MOESM2 [file 18663664]

**Supplementary Table 2:** Infant HIV PCR test results of tests performed less than 2 months postpartum

| <b>No. HEIs (% of participants in study group)</b> | <b>MIP (n=379)</b> | <b>MIP+SMS (n=390)</b> | <b>SOC (n=298)</b> |
|----------------------------------------------------|--------------------|------------------------|--------------------|
| Tested                                             | 273 (72.0%)        | 299 (76.7%)            | 185 (62.1%)        |
| Negative                                           | 220 (58.0%)        | 283 (72.6%)            | 165 (55.4%)        |
| Positive                                           | 6 (1.6%)           | 5 (1.3%)               | 3 (1.0%)           |
| Unknown                                            | 47 (12.4%)         | 11 (2.8%)              | 17 (5.7%)          |
