# Supplementary material for: Receipt of infant HIV DNA PCR test results is associated with a reduction in retention of HIV-exposed infants in integrated HIV care and healthcare services: a quantitative sub-study nested within a cluster randomised trial in rural Malawi
Source: Springer Nature journal article supplement (doi:10.1186/s12889-020-09973-y), 2020-12-01
Supplement: MOESM3 [file 18663664]

**Supplementary Table 3:** Breastfeeding status of the subgroup of 507 HIV-infected women that received their infant's HIV test results *at the infant's last recorded breastfeeding status*.

| Breastfeeding status             | HIV PCR test result |          |         | Total |
|----------------------------------|---------------------|----------|---------|-------|
|                                  | Negative            | Positive | Missing |       |
| Exclusive                        | 65                  | 9        | 0       | 74    |
| Complementary/mixed              | 384                 | 1        | 4       | 389   |
| *Stopped breastfeeding < 6 weeks | 12                  | 0        | 0       | 12    |
| *Stopped breastfeeding > 6 weeks | 32                  | 0        | 0       | 32    |
| <i>TOTAL</i>                     | 493                 | 10       | 4       | 507   |

\*Information recorded in dataset
