# Supplementary material for: Receipt of infant HIV DNA PCR test results is associated with a reduction in retention of HIV-exposed infants in integrated HIV care and healthcare services: a quantitative sub-study nested within a cluster randomised trial in rural Malawi
Source: Springer Nature journal article supplement (doi:10.1186/s12889-020-09973-y), 2020-12-01
Supplement: MOESM4 [file 18663664]

**Supplementary Table 4:** Breastfeeding status of subgroup of 507 HIV-infected women that received infant's HIV test results *at the date of censoring (when the infant dropped out of the study)*.

| Breastfeeding status             | HIV PCR test result |          |         | Total |
|----------------------------------|---------------------|----------|---------|-------|
|                                  | Negative            | Positive | Missing |       |
| Exclusive                        | 58                  | 2        | 0       | 60    |
| Complementary/mixed              | 371                 | 1        | 3       | 375   |
| *Stopped breastfeeding < 6 weeks | 12                  | 0        | 0       | 12    |
| *Stopped breastfeeding > 6 weeks | 32                  | 0        | 0       | 32    |
| Unknown                          | 20                  | 7        | 1       | 28    |
| <i>TOTAL</i>                     | 493                 | 10       | 4       | 507   |

\*Information recorded in dataset
